# Supplementary material for: A native chromatin extraction method based on salicylic acid coated magnetic nanoparticles and characterization of chromatin
Source: Royal Society of Chemistry journal article supplement (doi:10.1039/c4an01897d), 2014-11-25
Supplement: c4an01897d1.pdf [file c4an01897d1.pdf]

# Supplementary Information

## A native chromatin extraction method based on salicylic acid coated magnetic nanoparticles and characterization of chromatin

Zhongwu Zhou, Joseph Irudayaraj\*

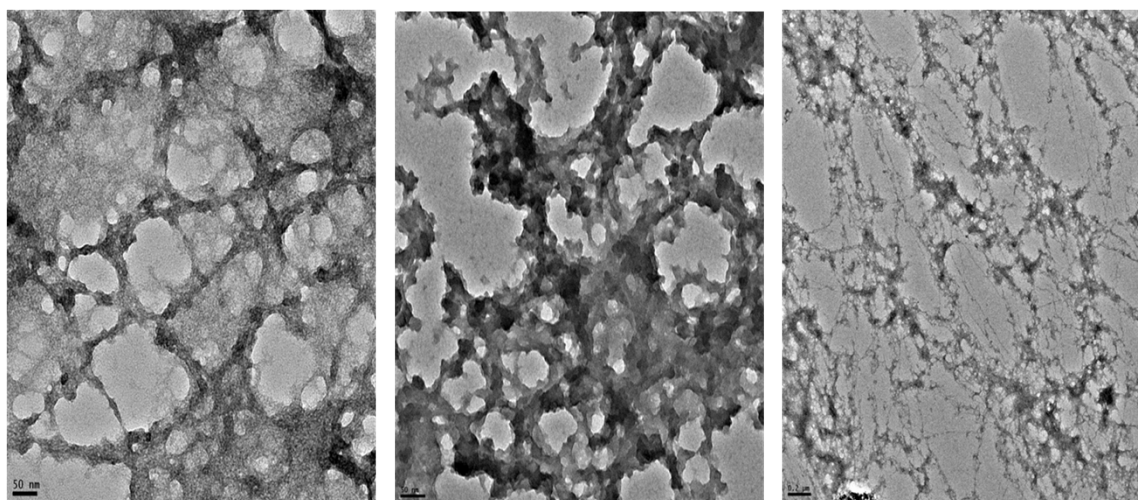

**Supplementary Figure 1.** (A) chromatin extracted by 50 µl of 7.2% SDS; (B) chromatin extracted by 500 µl of 0.72% SDS; (C) DNA extracted by 50 µl of lysing buffer according to Zhou et al (24).

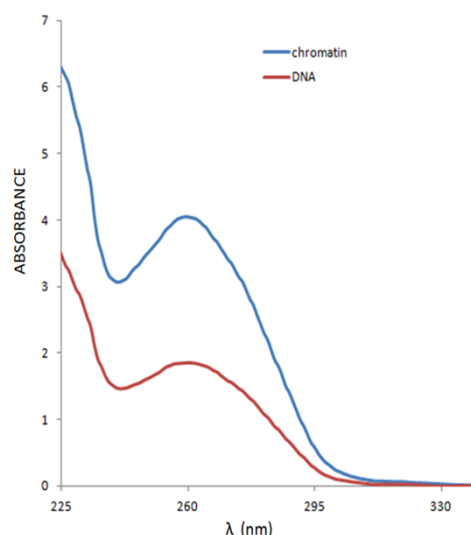

**Supplementary Figure 2.** The absorption spectra of extracted chromatin and the corresponding DNA. DNA was prepared from chromatin by phenol/Chloroform extraction.

1

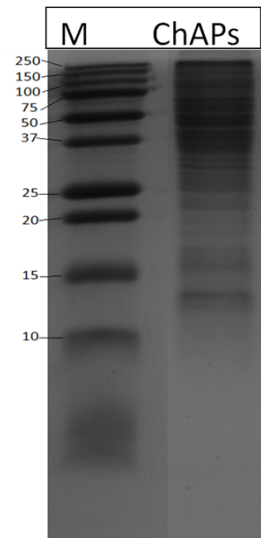

2

3 **Supplementary Figure 3.** 15% SDS-PAGE of chromatin associated proteins (ChAPs), stained  
4 by Coomassie blue.

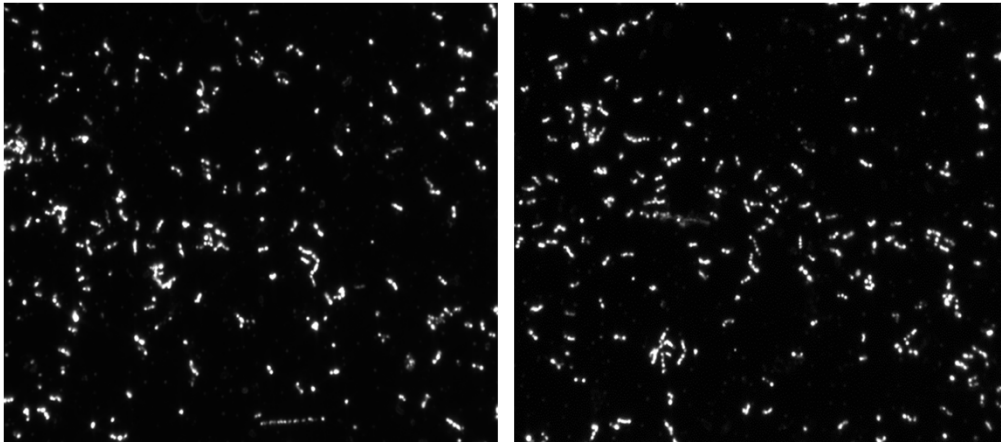

5

6 **Supplementary Figure 4.** Chromatin observed by dark-field microscopy.

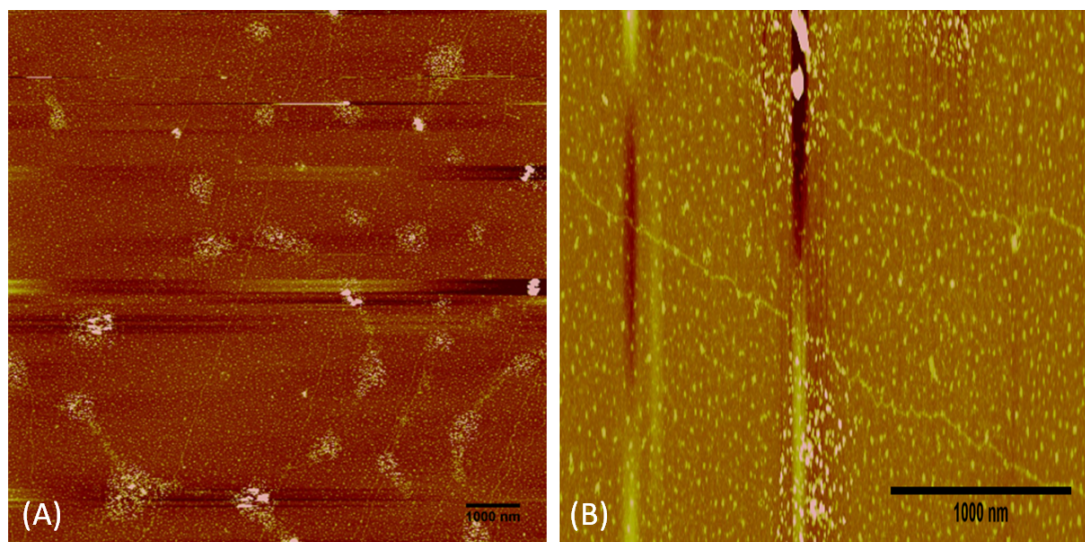

**Supplementary Figure 5.** Long and single chromatin fibers (about 10  $\mu\text{m}$ ) is shown in (A), and a detailed structure in (B). Scale bar are provided in the lower right of each figure by ImageJ.

**Table S1** Antibody information for fluorescence immunostaining and Western blotting analysis.

| Antibody                   | Company           | Catalog NO. | Dilution times/application |
|----------------------------|-------------------|-------------|----------------------------|
| H4                         | abcam             | ab10158     | 500/WB                     |
| H3K9me3                    | abcam             | ab8898      | 500/WB                     |
| Lamin B                    | abcam             | ab16048     | 1000/WB                    |
| H3                         | abcam             | ab1791      | 1000/IF                    |
| Goat-anti rabbit-Alexa 647 | Life technologies | A-21245     | 1000/IF                    |
